# Supplementary material for: A Literature Review of Women's Sex Hormone Changes by Acupuncture Treatment: Analysis of Human and Animal Studies
Source: PubMed Central journal article supplement (PMC6276442; doi:10.1155/2018/3752723), 2018-11-15
Supplement: 3752723.f1.pdf [file 3752723.f1.pdf]

**Supplementary Table 1. Detailed description of acupuncture treatment in the studies**

| Author                        | Year | Acupuncture method | Subject | Point used                                                                           | Duration                                                                                                                                                    | Detailed stimulation methods                    |
|-------------------------------|------|--------------------|---------|--------------------------------------------------------------------------------------|-------------------------------------------------------------------------------------------------------------------------------------------------------------|-------------------------------------------------|
| Maliqueo <i>et al.</i>        | 2015 | EA                 | Rat     | N/A                                                                                  | 15 min for 1 <sup>st</sup> week, 20 min for 2 <sup>nd</sup> , 3 <sup>rd</sup> week, 25 min for 4 <sup>th</sup> , 5 <sup>th</sup> , and 6 <sup>th</sup> week | 2 Hz with 0.1 s, 80 Hz burst pulses, 0.6-1.4 mA |
| Johansson <i>et al.</i>       | 2013 | EA+MA              | Human   | (CV3, CV6, ST29, SP6, SP9, LI4, GV20) OR (CV3, CV6, ST25, ST29, SP6, LR3, PC6, GV20) | min/day, twice/week for 10-13 weeks                                                                                                                         | 2 Hz                                            |
| Feng <i>et al.</i>            | 2012 | EA+MA              | Rat     | N/A                                                                                  | 15 min for 1 <sup>st</sup> week, 20 min for 2 <sup>nd</sup> , 3 <sup>rd</sup> week, 25 min for 4 <sup>th</sup> and 5 <sup>th</sup> week                     | 2 Hz with 0.1 s, 80 Hz burst pulses, 0.6-1.4 mA |
| Pastore <i>et al.</i>         | 2011 | MA                 | Human   | BL23, BL28, SP6, SP9.                                                                | Twice/ week for 4 weeks, once/week for 4 weeks                                                                                                              | N/A                                             |
| Stener-Victorin <i>et al.</i> | 2000 | EA                 | Human   | N/A                                                                                  | twice/week for 4 weeks                                                                                                                                      | 2 Hz, 0.5 ms for 30 min                         |
| Ma <i>et al.</i>              | 2017 | EA                 | Rat     | CV3, CV4, SP6                                                                        | 30 min/day for 3 days                                                                                                                                       | 2 Hz, 0.6 ms, 0.8-1.4 mA                        |
| Qin <i>et al.</i>             | 2013 | EA                 | Rat     | BL18, BL20, BL23, ST36, SP6 CV3,                                                     | 30 min/day for 14 days                                                                                                                                      | 10 Hz, 1-5 mA                                   |
| Yao <i>et al.</i>             | 2007 | EA                 | Rat     | CV4, EX-CA1                                                                          | 30 min/day for 3 days                                                                                                                                       | 3 Hz, 0.2 ms, 80 pulses/s, 2mA                  |
| Zhao <i>et al.</i>            | 2004 | EA                 | Rat     | CV3, CV4, EX-CA1                                                                     | 30 min/day for 3 days                                                                                                                                       | 3 Hz, 0.2 ms, 80 pulses/s, 2mA                  |
| Zhao <i>et al.</i>            | 2003 | EA                 | Rat     | CV3, CV4, EX-CA1, SP6                                                                | 30 min/day for 3 days                                                                                                                                       | 3 Hz, 2mA                                       |
| Sunay <i>et al.</i>           | 2011 | MA                 | Human   | ST36, LI4, KI3, LR3, EX-HN3, CV3                                                     | 20 min/day, twice/week,                                                                                                                                     | without manual stimulation                      |
| Qu <i>et al.</i>              | 2007 | MA                 | Human   | SP6, GB20, CV4, LI4, KI3, EX-CA1                                                     | 40 min/day, twice/week for 12 weeks                                                                                                                         | N/A                                             |
| Dong <i>et al.</i>            | 2001 | MA                 | Human   | SP6, KI3, BL23                                                                       | 25 min/day, twice/week for 5 weeks                                                                                                                          | N/A                                             |
| Wang <i>et al.</i>            | 2016 | EA                 | Human   | BL33 OR (CV4, ST25, EX-CA1)                                                          | 20 min/day, 5 times/week for 4 weeks, 3 times/week for 12 weeks                                                                                             | dilatational wave, 0.5 ms, 2/15 Hz, 0.1-10mA    |
| Xiong <i>et al.</i>           | 2015 | MA                 | Rat     | SP6, ST36                                                                            | 25 min/day, for 5-8 days                                                                                                                                    | rotating and stirring needles at every 5 min    |
| Zhou <i>et al.</i>            | 2013 | EA                 | Human   | BL33 OR (CV4, ST25, ST29)                                                            | 20 min/day, 5 times/week for 4 weeks, 3 times/week for 2 months                                                                                             | continuous wave, 20 Hz, 1-4 mA                  |
| Magarelli <i>et al.</i>       | 2009 | N/A                | Human   | P6, SP8, SP6, LV3, GV20, ST29, ST36, SP10, LI4                                       | 30 min/day, 11 times/ 24 hours before and 1 hour after ET                                                                                                   | 2 Hz, 0.5 ms for 30 min                         |
| Zhang <i>et al.</i>           | 2007 | EA                 | Rat     | GV20, GV4, BL23, KI3                                                                 | 30min/day for 10 days                                                                                                                                       | single pulse, 30 Hz, 6 V                        |

|                            |      |    |       |                                                       |                                         |                                          |
|----------------------------|------|----|-------|-------------------------------------------------------|-----------------------------------------|------------------------------------------|
| Gaudernack <i>et al.</i>   | 2006 | MA | Human | ST36, LR3, CV4, TE6, LU7, HT7, LI4,<br>GB41, KI3, KI6 | 20min/day approximately 24 h after PROM | N/A                                      |
| Yang <i>et al.</i>         | 2006 | EA | Rat   | ST36                                                  | 30 min/day                              | dense-disperse wave (10 Hz-20 Hz), 2-3 V |
| Yang <i>et al.</i>         | 2006 | EA | Rat   | ST36                                                  | 30 min/day OR 10 min/day                | dense-disperse wave (10 Hz-20 Hz), 2-3 V |
| Uvnäs-Moberg <i>et al.</i> | 1993 | EA | Rat   | BL11, BL54                                            | 30 min/day                              | 100 Hz                                   |
| Zheng <i>et al.</i>        | 2013 | MA | Human | CV4, CV6, CV10, CV12, ST21, ST25, ST28                | 30 min/day, twice/week for 6 months     | N/A                                      |
| N/A; not applicable        |      |    |       |                                                       |                                         |                                          |
